# Supplementary material for: Insect-based diet, a promising nutritional source, modulates gut microbiota composition and SCFAs production in laying hens
Source: PubMed Central journal article supplement (PMC5701250; doi:10.1038/s41598-017-16560-6), 2017-11-24

# **Insect-based diet, a promising nutritional source, modulates gut microbiota composition and SCFAs production in laying hens**

**Luca Borrelli<sup>1,6,\*,+</sup>, Lorena Coretti<sup>2,3,6,+</sup>, Ludovico Dipineto<sup>1,6</sup>, Fulvia Bovera<sup>1</sup>, Francesca Menna<sup>1,6</sup>, Lorenzo Chiariotti<sup>2,4,6</sup>, Antonio Nizza<sup>1</sup>, Francesca Lembo<sup>5,6</sup> and Alessandro Fioretti<sup>1,6</sup>**

<sup>1</sup>Department of Veterinary Medicine and Animal Productions, University of Naples Federico II, Naples, Italy

<sup>2</sup>Institute of Experimental Endocrinology and Oncology "Gaetano Salvatore" IEOS, National Research Council CNR, Naples, Italy

<sup>3</sup>Department of Advanced Biomedical Science, University of Naples Federico II, Naples, Italy.

<sup>4</sup>Department of Molecular Medicine and Medical Biotechnologies, University of Naples Federico II, Naples, Italy

<sup>5</sup>Department of Pharmacy, University of Naples Federico II, Naples, Italy

<sup>6</sup>Task Force on Microbiome Studies, University of Naples Federico II, Naples, Italy.

\*luca.borrelli@unina.it

+These authors contributed equally to this work.

## Supplementary information

**Supplementary Table 1.** Total lipids and cholesterol determination in egg yolks.

| Parameter                    | SD group      | ID group       |
|------------------------------|---------------|----------------|
| Total lipids, g/100 g        | 32.60 ± 0.72  | 30.93 ± 0.83   |
| Cholesterol, mg/100 g lipids | 0.386 ± 0.002 | 0.312 ± 0.004* |

Total lipids, measured according to Folch et al (1957)<sup>59</sup> and cholesterol levels measured by gas-chromatograph method<sup>60</sup> of twenty-one eggs for each group collected during eight different deposition days (means ± standard errors). P-values were calculated by two tailed Student's t-test; \*p<0.05.

**Supplementary Table 2.** KEGG Orthologs count of chitinase (K01183), beta-N-acetylhexosaminidase (K01207) and N-acetylglucosamine-6-phosphate deacetylase (K01443) in SD and ID groups.

| KEGG Orthologs | KEGG Description                                          | SD group      | ID group         |
|----------------|-----------------------------------------------------------|---------------|------------------|
| K01183         | chitinase [EC:3.2.1.14]                                   | 14.50 ± 1.20  | 9.17 ± 0.7**     |
| K01207         | beta-N-acetylhexosaminidase [EC:3.2.1.52]                 | 38.83 ± 1.92  | 166.33 ± 9.48*** |
| K01443         | N-acetylglucosamine-6-phosphate deacetylase [EC:3.5.1.25] | 103.00 ± 4.92 | 188.83 ± 9.16*** |

Data are means and standard errors. P-values were calculated by two tailed Student's t-test (\*\*p<0.01, \*\*\*p<0.001).

**Supplementary Table 3.** KEGG Orthologs count of genes codifying for key enzymes involved in butyrate and propionate production from carbohydrates in SD and ID groups.

| KEGG Orthologs                | KEGG Description                                                                          | SD group       | ID group          |
|-------------------------------|-------------------------------------------------------------------------------------------|----------------|-------------------|
| <b>PIRUVATE → BUTYRATE</b>    |                                                                                           |                |                   |
| K00170/1/2                    | pyruvate ferredoxin oxidoreductase, beta/ delta/gamma subunit [EC:1.2.7.1]                | 209.84 ± 58.09 | 364.84 ± 78.44    |
| K00626                        | acetyl-CoA C-acetyltransferase [EC:2.3.1.9]                                               | 119.34 ± 39.24 | 125 ± 14.9        |
| K00074                        | 3-hydroxybutyryl-CoA dehydrogenase [EC:1.1.1.157]                                         | 101.5 ± 21.06  | 228.84 ± 18.07*** |
| K01692                        | enoyl-CoA hydratase [EC:4.2.1.17]                                                         | 36.34 ± 2.3    | 64.84 ± 8.91*     |
| K00248                        | butyryl-CoA dehydrogenase [EC:1.3.8.1]; butyryl-CoA dehydrogenase [EC:1.3.99.2]           | 143.34 ± 42.64 | 209.67 ± 26.62    |
| K00634                        | phosphate butyryltransferase [EC:2.3.1.19]                                                | 90.34 ± 20.6   | 108.17 ± 12.29    |
| K00929                        | butyrate kinase [EC:2.7.2.7]                                                              | 90.34 ± 20.6   | 108.17 ± 12.29    |
| <b>PIRUVATE → ACETATE</b>     |                                                                                           |                |                   |
| K04020                        | phosphotransacetylase                                                                     | 0              | 0                 |
| K00925                        | acetate kinase [EC:2.7.2.1]                                                               | 138 ± 20.64    | 264.34 ± 24.46**  |
| <b>ACETATE → BUTYRATE</b>     |                                                                                           |                |                   |
| K01034                        | acetate CoA-transferase alpha subunit [EC:2.8.3.8]                                        | 57.34 ± 17.96  | 62 ± 9.76         |
| <b>PIRUVATE → SUCCINATE</b>   |                                                                                           |                |                   |
| K01958                        | pyruvate carboxylase [EC:6.4.1.1]                                                         | 66.17 ± 18.91  | 100.34 ± 13.99    |
| K00024                        | malate dehydrogenase [EC:1.1.1.37]                                                        | 64.17 ± 3.05   | 25.5 ± 1.03***    |
| K01677                        | fumarate hydratase subunit alpha [EC:4.2.1.2]                                             | 109 ± 19.74    | 251.67 ± 24.47*** |
| K01678                        | fumarate hydratase subunit beta [EC:4.2.1.2]                                              | 100.84 ± 20.07 | 229.17 ± 25.16**  |
| K00239                        | succinate dehydrogenase flavoprotein subunit [EC:1.3.99.1]                                | 89.5 ± 20.25   | 27.34 ± 2.65*     |
| <b>SUCCINATE → BUTYRATE</b>   |                                                                                           |                |                   |
| K01903                        | succinyl-CoA synthetase beta subunit [EC:6.2.1.5]                                         | 25.17 ± 2.47   | 6.34 ± 0.5***     |
| K01902                        | succinyl-CoA synthetase alpha subunit [EC:6.2.1.5]                                        | 25.17 ± 2.47   | 6.34 ± 0.5***     |
| K15038                        | succinyl-coA reductase [EC:1.2.1.76]                                                      | 0              | 0                 |
| K00043                        | 4-hydroxybutyrate dehydrogenase [EC:1.1.1.61]                                             | 0              | 0                 |
| K14472                        | succinyl-CoA:(S)- malate CoA transferase subunit B [EC:2.8.3.-]                           | 0              | 0                 |
| K14471                        | succinyl-CoA:(S)- malate CoA transferase subunit A [EC:2.8.3.-]                           | 0              | 0                 |
| K14534                        | 4-hydroxybutyryl-CoA dehydratase / vinylacetyl-CoA-Delta-isomerase [EC:4.2.1.120 5.3.3.3] | 38.5 ± 1.41    | 138.17 ± 20.66*** |
| <b>SUCCINATE → PROPIONATE</b> |                                                                                           |                |                   |
| K01903                        | succinyl-CoA synthetase beta subunit [EC:6.2.1.5]                                         | 25.17 ± 2.47   | 6.34 ± 0.5***     |
| K01902                        | succinyl-CoA synthetase alpha subunit [EC:6.2.1.5]                                        | 25.17 ± 2.47   | 6.34 ± 0.5***     |
| K01847                        | methylmalonyl-CoA mutase [EC:5.4.99.2]                                                    | 86.34 ± 4.73   | 39.17 ± 2.14***   |
| K05606                        | methylmalonyl-CoA epimerase [EC:5.1.99.1]                                                 | 0 ± 0          | 0 ± 0             |
| K03416                        | methylmalonyl-CoA carboxyltransferase [EC:2.1.3.1]                                        | 0 ± 0          | 0 ± 0             |
| <b>GLUCOSE → PROPIONATE</b>   |                                                                                           |                |                   |
| K00016                        | L-lactate dehydrogenase [EC:1.1.1.27]                                                     | 65.17 ± 4.24   | 175.17 ± 9.11***  |
| K01026                        | propionate CoA-transferase [EC:2.8.3.1]                                                   | 62.67 ± 20.3   | 62.34 ± 9.68      |

Data are means and standard errors. P-values were calculated by two tailed Student's t-test (\*p<0.05, \*\*p<0.01, \*\*\*p<0.001).

**Supplementary figure 1.** Unweighted PCoA biplot displays ten more abundance species (grey spheres) that drive the samples clustering (5,234 sequences/sample). The size and location of the grey spheres are plotted according to presence/absence of the respective OTUs in each sample.

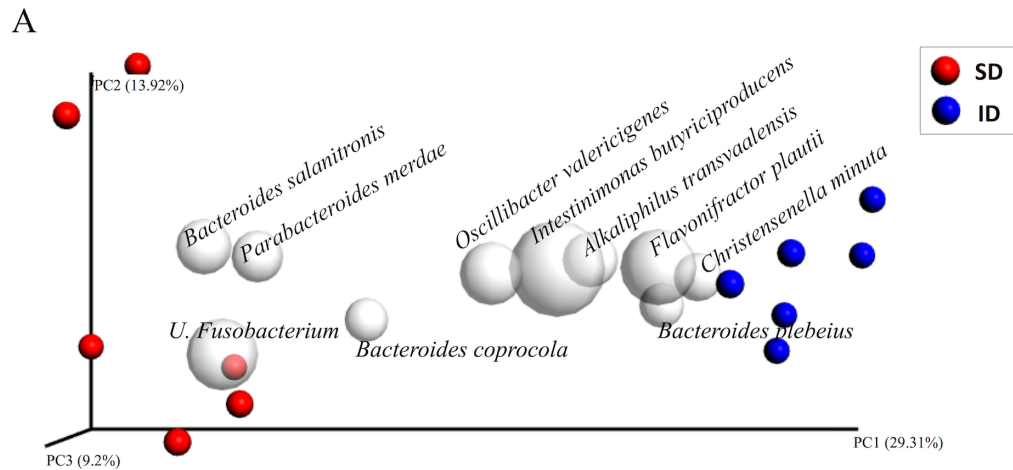

**Supplementary figure 2.** PCA of significant bacterial species, SCFAs levels, body weight, feed intake, cholesterol and triglycerides concentrations distribution in ID and SD samples. The vectors represented by grey arrows show how (the direction) and how much (the length) each parameter contributes to the total correlations represented by PC1 and PC2.

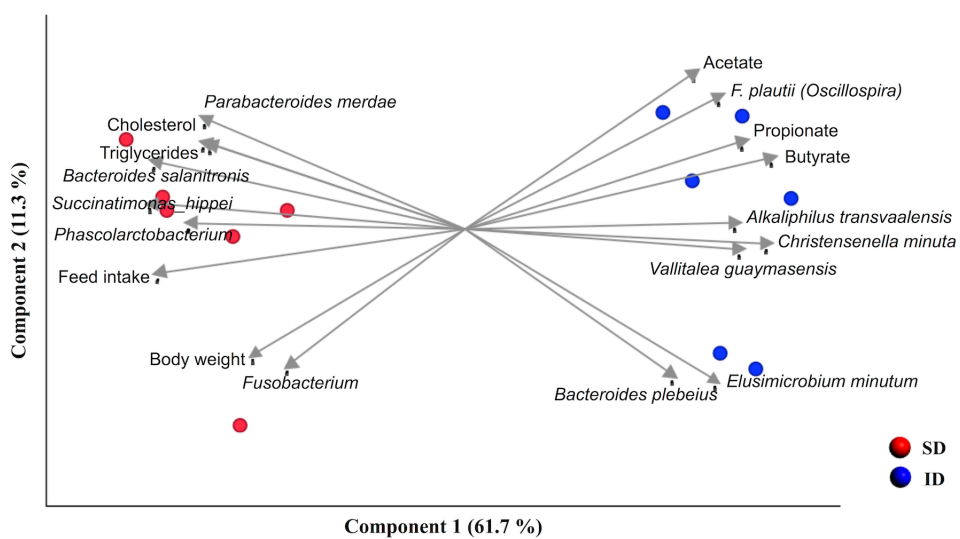

Supplement: 41598_2017_16560_MOESM1_ESM.pdf [file 41598_2017_16560_MOESM1_ESM.pdf]
